# Supplementary material for: Alternative Splicing, Internal Promoter, Nonsense-Mediated Decay, or All Three: Explaining the Distribution of Truncation Variants in Titin
Source: PubMed Central journal article supplement — Circ Cardiovasc Genet. 2016 Oct 18;9(5):419–25. doi: 10.1161/CIRCGENETICS.116.001513 (PMC5068190; doi:10.1161/circgenetics.116.001513), 2016-10-18
Supplement: hcg-9-419-s003.pdf [file hcg-9-419-s003.pdf]

18-May-2016

We acknowledge that since the revised manuscript entitled "**Alternative splicing, an internal promoter, nonsense-mediated decay, or all three: explaining the distribution of truncating variants in *Titin***" no longer contains any experimental data it is appropriate that we are no longer considered as authors.

Sincerely,



Diana Tran



Angelo Pelonero
